# Supplementary material
Source: PubMed Central journal article supplement (PMC5591072)
Supplement: NIHMS893577-supplement-3.pdf [file NIHMS893577-supplement-3.pdf]

| Patient sample ID | MDACC protocol                             | Stage of disease | Current therapy (at time of sample acquisition) | Prior systemic therapy                    | Response by RECIST 1.1 at sample acquisition | Time (days) since last dose of therapy (at time of sample acquisition) | Tissue type        | BRAF status | NRAS status |
|-------------------|--------------------------------------------|------------------|-------------------------------------------------|-------------------------------------------|----------------------------------------------|------------------------------------------------------------------------|--------------------|-------------|-------------|
| 227               | 2012-0846, 2015-0041                       | 3c               | Ipilimumab + Nivolumab (neoadjuvant)            | None                                      | SD                                           | 17                                                                     | Cutaneous melanoma | V600E       | WT          |
| 267               | 2012-0846                                  | 4a               | Pembrolizumab                                   | Ipilimumab                                | SD                                           | 18                                                                     | Acral melanoma     | WT          | WT          |
| 193               | 2012-0846, PA13-0291                       | 4c               | Ipilimumab + Nivolumab                          | Ipilimumab (adjuvant)                     | PR                                           | 10                                                                     | Cutaneous melanoma | V600E       | WT          |
| 170               | 2012-0846, PA13-0291                       | 4c               | Ipilimumab + Nivolumab                          | High-dose IL-2; Ipilimumab; Pembrolizumab | PD                                           | 13                                                                     | Cutaneous melanoma | WT          | Q61K        |
| 120               | 2012-0846, LAB00-063                       | 4c               | Ipilimumab                                      | Nivolumab                                 | PD                                           | 59                                                                     | Cutaneous melanoma | WT          | Q61R        |
| 251               | 2015-0041, 2012-0846, PA13-0291            | 4a               | Nivolumab (neoadjuvant)                         | None                                      | SD                                           | 22                                                                     | Cutaneous melanoma | V600E       | WT          |
| 224               | 2015-0041, LAB00-063, 2012-0846, PA13-0291 | 3c               | Nivolumab (neoadjuvant)                         | None                                      | SD                                           | 21                                                                     | Cutaneous melanoma | WT          | Q61K        |

Table S3. Related to Figure 5 and S5. **Clinical annotation of human melanoma samples analyzed by mass cytometry.**

A cohort of 7 patients with metastatic melanoma treated at The University of Texas MD Anderson Cancer Center (MDACC) had tumor samples collected and analyzed under Institutional Review Board (IRB)–approved protocols. Cryopreserved tumor digests were analyzed by mass cytometry. The relevant clinical annotations of these patient samples are denoted. Current therapy is displayed (anti-CTLA-4, Ipilimumab; anti-PD-1, Nivolumab or Pembrolizumab; or combination thereof). Response according to RECIST 1.1 criteria at the time of sample acquisition is noted (PR, partial response; SD, stable disease; PD, progressive disease). Hotspot mutational status of *BRAF* and *NRAS* are denoted as wild-type (WT) or the relevant mutant allele.
